# Supplementary material
Source: PubMed Central journal article supplement (PMC2427307)
Supplement: mmc1.pdf [file mmc1.pdf]

## Supplemental Data

### Identification of *CC2D2A* as a Meckel Syndrome Gene

### Adds an Important Piece to the Ciliopathy Puzzle

Jonna Tallila, Eveliina Jakkula, Leena Peltonen, Riitta Salonen, and Marjo Kestilä

Table S1. Primer sequences for *CC2D2A*

| Genomic Primers for the <i>CC2D2A</i> Gene |         |                          |             |         |                          |
|--------------------------------------------|---------|--------------------------|-------------|---------|--------------------------|
| exon 1                                     | forward | attcaacagcaccgtctctc     | exon 18     | forward | ctgtggctcctctggtaaag     |
|                                            | reverse | cagagctttggcagagagcat    |             | reverse | atgtggtttgccatgttg       |
| exon 2                                     | forward | atggaaccacagccaataagtc   | exon 19     | forward | ccacaatgagatgagcccttag   |
|                                            | reverse | agctcttctctgaccattcgaata |             | reverse | acttgcaaaaagtgcatagc     |
| exon 3                                     | forward | ttctcttggcacttatctcca    | exon 20     | forward | tcagcatcatcacctgaagaaa   |
|                                            | reverse | gggtggcctaactctctcattc   |             | reverse | ctggcacctgacaataaaagga   |
| exon 4                                     | forward | taactgtccccaactcacact    | exon 21     | forward | gcacttttatgactggacaga    |
|                                            | reverse | aacaggctccttccatctttc    |             | reverse | cagcaccatgttcttaaacag    |
| exon 5                                     | forward | gtactaaggcctgtcccctcac   | exon 22     | forward | tcagtccaagtttcttgat      |
|                                            | reverse | ctcaccaagttggggtaaagtg   |             | reverse | aaccgctattgctagtgacaaca  |
| exon 6                                     | forward | agatgacagtgctaggcaggac   | exon 23     | forward | tgtggcctctatttctctga     |
|                                            | reverse | ctttaaggggaagagcaaggaa   |             | reverse | gctaagtggcttcataagctc    |
| exon 7                                     | forward | atttctctgctcttcccctta    | exon 24     | forward | accagcattgcagaggaaagta   |
|                                            | reverse | ctttgaactcctgggcctaagt   |             | reverse | ttgatttgaagtagggagggt    |
| exon 8                                     | forward | gttctacaggctgtcgctatgg   | exon 25     | forward | ccttgataagcagcagctaga    |
|                                            | reverse | gctcaatatatctgctgtcttgg  |             | reverse | cagtcacctgctgaacaataac   |
| exon 9                                     | forward | cctggaatatgctgatctcat    | exons 26&27 | forward | ggaggatcacctgagcttgg     |
|                                            | reverse | ggtttctctcagccactttct    |             | reverse | tgccgctcactagctacaaaat   |
| exon 10                                    | forward | acatctccaggtgtgcagaat    | exon 28     | forward | gggaatatgagactcaccagga   |
|                                            | reverse | gttctggagatgaggcatcctt   |             | reverse | tgtggactcgtctgaattctt    |
| exon 11                                    | forward | ttcatctttccttggttctgc    | exon 29     | forward | ggccacaaagccattatgtatc   |
|                                            | reverse | gggttttgagcagttgagaagtt  |             | reverse | ctcagatgatgtgccctcctt    |
| exon 12                                    | forward | actttttaggaagccagggtgt   | exon 30     | forward | caatgaaaagaaggcaaggaag   |
|                                            | reverse | atagcaccccaagctattcaga   |             | reverse | attgctgattgaccgattact    |
| exon 13                                    | forward | cgttttccattgtggattaga    | exon 31     | forward | ttccaaaccatacatttctg     |
|                                            | reverse | aaccgaggaaacatgtgaaaga   |             | reverse | tggctgccttcagacttttcta   |
| exon 14                                    | forward | ccatggaacaaggatggacata   | exon 32     | forward | gatgtttggtgaggatggagat   |
|                                            | reverse | cagaagcggtagctgtagcact   |             | reverse | ccttgagaaaattgaaccagga   |
| exon 15                                    | forward | tcaagacaggtgacatcctattg  | exon 33     | forward | agagaaaacacatgccacta     |
|                                            | reverse | ttggggattgaggagaatgta    |             | reverse | caaccxaaaggatcgttatgaa   |
| exon 16                                    | forward | aagaggaactggcacatagcaa   | exon 34     | forward | tggttgagtaagatgatgactgac |
|                                            | reverse | gtaagcacagtgagcattgcag   |             | reverse | cactgtgcttgacactgcattt   |
| exon 17                                    | forward | ctgagtccaagggcaacaaata   | exon 35     | forward | aggtaaccccccaacttcagat   |
|                                            | reverse | gtcagcaattcatgtgtgtca    |             | reverse | tgagctcagatgcgtttgataa   |

|                                                              |         |                         |  |
|--------------------------------------------------------------|---------|-------------------------|--|
| exon 36                                                      | forward | tacttttgggtgggcatgggta  |  |
|                                                              | reverse | tttgagccatgggatttagaga  |  |
| exon 37                                                      | forward | acccttaaggacaggactgcat  |  |
|                                                              | reverse | atgtacttctgggagcaacgtg  |  |
| exon 38                                                      | forward | gcagctctcgattttctgtattg |  |
|                                                              | reverse | gggtagtctcaattgaattcagg |  |
| <b>Primers to Amplify the c.1761-1764 Deletion from cDNA</b> |         |                         |  |
| cDNA                                                         | forward | gatcagatctggagaccctct   |  |
| cDNA                                                         | reverse | ccaaagtgaactcggaagtctg  |  |
